# Supplementary material for: Cell-Penetrating CEBPB and CEBPD Leucine Zipper Decoys as Broadly Acting Anti-Cancer Agents
Source: MDPI journal article supplement (doi:10.3390/cancers13102504), 2021-05-20
Supplement: s1 [file s1]

## Supplementary Fig S2

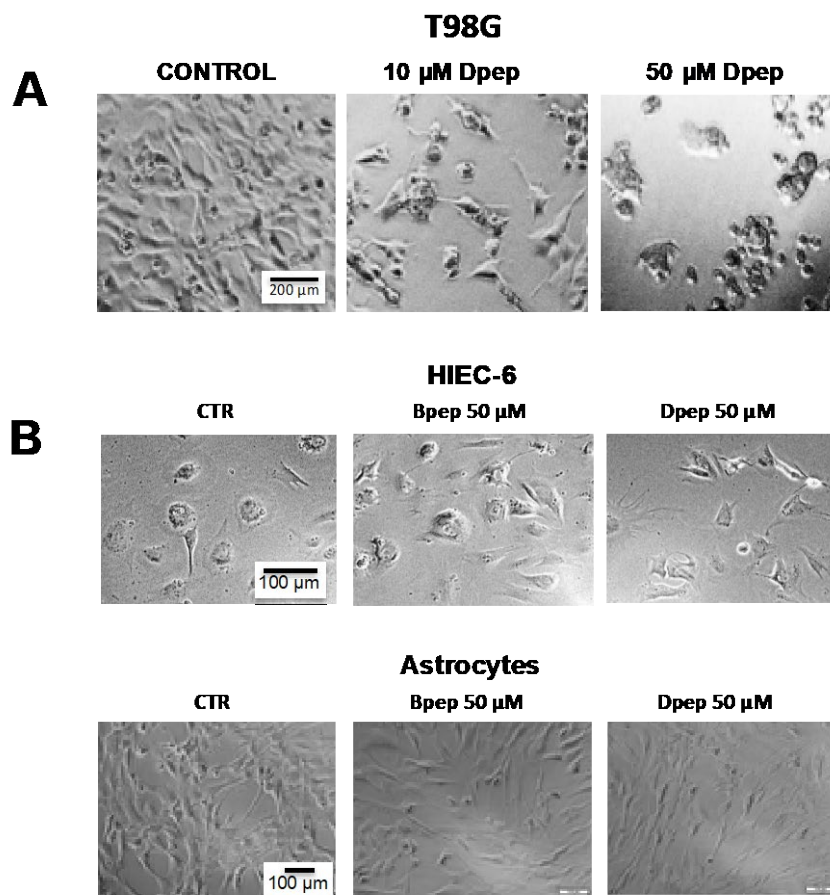

Supplementary Figure S2. **Images of Bpep and Dpep activities on tumor and non-transformed cells.** (A). Images of T98G cell cultures treated for 6 days with 0, 10 or 50  $\mu$ M concentrations of Dpep. (B). Images of non-transformed HIEC-6 and human astrocytes after 6 days of exposure to 50  $\mu$ M Bpep or Dpep.
