# Supplementary material for: Cell-Penetrating CEBPB and CEBPD Leucine Zipper Decoys as Broadly Acting Anti-Cancer Agents
Source: MDPI journal article supplement (doi:10.3390/cancers13102504), 2021-05-20
Supplement: s1 [file s1]

Supplementary Figure S9

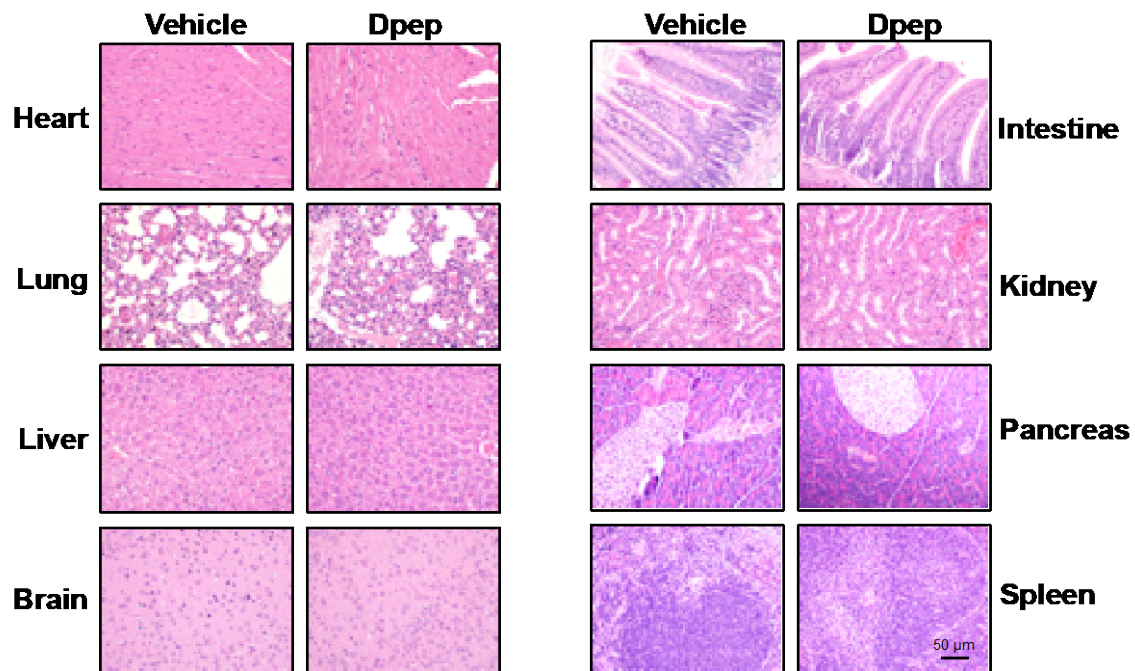

Supplementary Figure S9. **Dpep treatment does not affect the histological features of normal tissues.** Organs were removed at the endpoint of the experiment shown in Figure 6A in which animals were subjected to a full course of treatment with either Dpep or vehicle. Sections from the fixed tissues were stained with H&E. Panels show examples of sections of tissue from vehicle and Dpep-treated animals.
