# Supplementary material for: Cell-Penetrating CEBPB and CEBPD Leucine Zipper Decoys as Broadly Acting Anti-Cancer Agents
Source: Cancers (Basel). 2021 May 20;13(10):2504. doi: 10.3390/cancers13102504 (PMC8161188; doi:10.3390/cancers13102504)
Supplement: Supplementary file 1 [file cancers-13-02504-s001.zip]

Archive with 8 entries (8 files):
- cancers-1202275-supplementary 2/Supplementary Figure S2+legend 5-21.pdf
- cancers-1202275-supplementary 2/Supplementary Figure S4 + legend 5-21.pdf
- cancers-1202275-supplementary 2/Supplementary Figure S5 + legend 5-21.pdf
- cancers-1202275-supplementary 2/Supplementary Figure S6. + legend 5-21.pdf
- cancers-1202275-supplementary 2/Supplementary Figure S7 + legend 5-21.pdf
- cancers-1202275-supplementary 2/Supplementary Figure S8 + legend 5-21.pdf
- cancers-1202275-supplementary 2/Supplementary Figure S9.pdf
- cancers-1202275-supplementary 2/Supplementry Figure S1 + legend 5-21.pdf
